# Supplementary material
Source: PubMed Central journal article supplement (PMC6124411)
Supplement: jciinsight-3-97844-s018.pdf [file jciinsight-3-97844-s018.pdf]

# Borrok et al Supplemental figures

# Figure S1

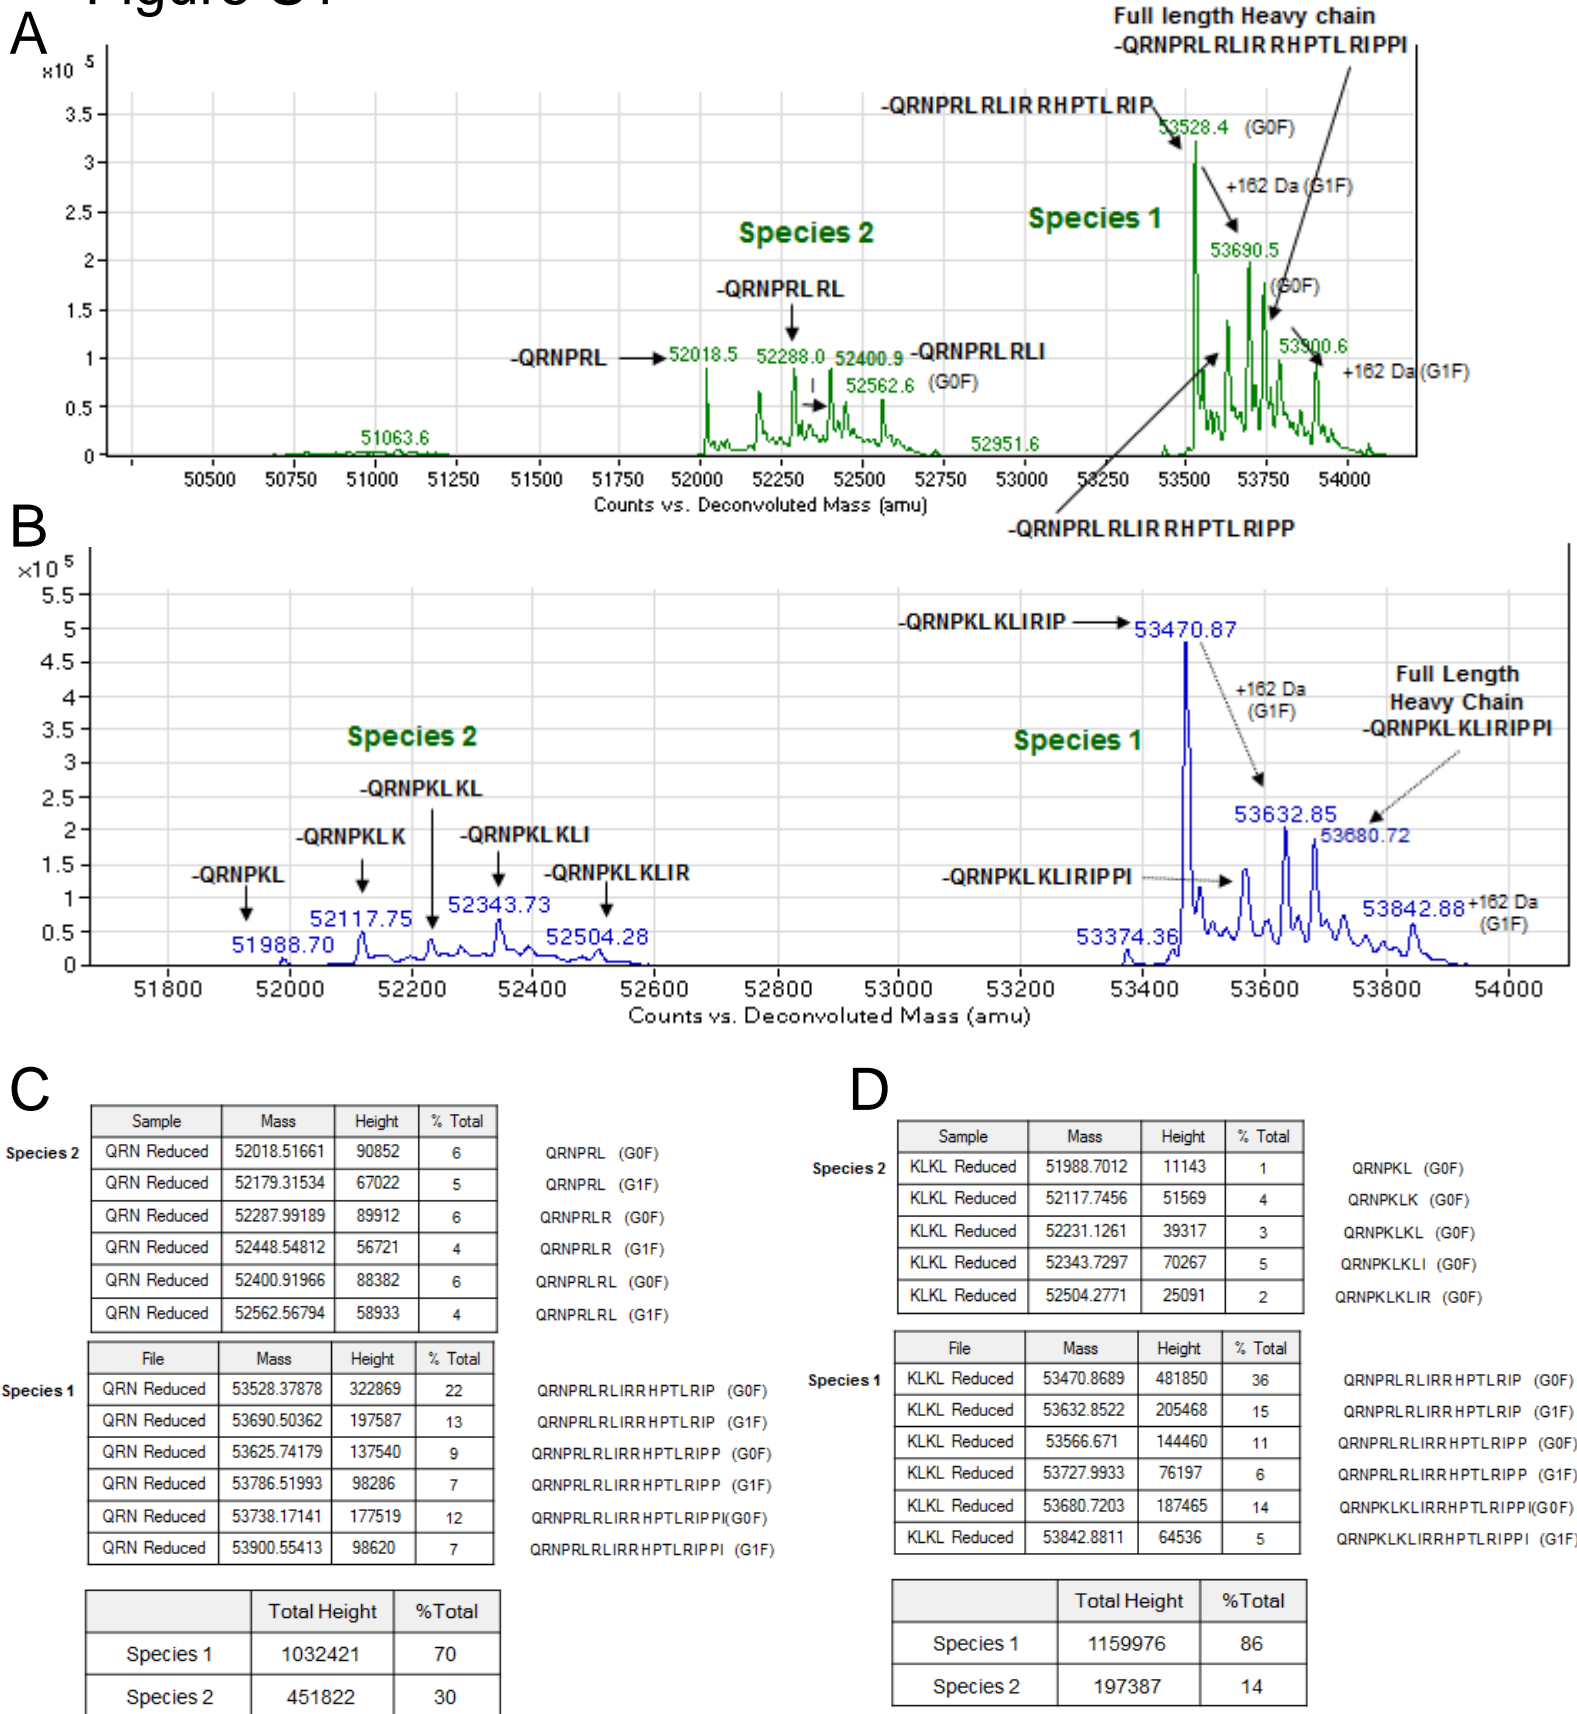

**Figure S1. LC-MS of purified Cam-003-QRN and Cam-003-KLKL antibodies.** Heavy Chain peaks identified after antibody reduction are shown for the QRN peptide fusion (A) and the KLKL fusion (B). Two major species are identified: Species 1 containing full length and 1 or 2 amino acid clipped species and Species 2 with cleavage occurring in the middle of the c-terminal peptide. Peak height was then used to estimate the relative abundance of either species 1 & 2 heavy chains for QRN (C) and KLKL (D) fused antibodies.

# Table S1.

| C-terminal Peptide Sequence                                                                                                                                       | Reference                                                                               | Monomer content upon purification | pIgR Binding |
|-------------------------------------------------------------------------------------------------------------------------------------------------------------------|-----------------------------------------------------------------------------------------|-----------------------------------|--------------|
| <b>SAMFV</b> PFDIAVGVRDGQQGL<br>GGSRRK GARLREAISSYAE                                                                                                              | White KD & Capra<br>JD 2002. J. Exp.<br>Med. 196(4):551-5.                              | >95%                              | Slight       |
| <b>VDDL</b> TLQSRSPPSQLNSQHL<br>LLSQLCGYWMFVRVRSRSCC<br>G                                                                                                         | White KD & Capra<br>JD 2002. J. Exp.<br>Med. 196(4):551-5.                              | 60%                               | No           |
| <b>IPSV</b> TRMTVGGTLRKEFQDV<br>VLGVIFGLVLVINRCSFL                                                                                                                | White KD & Capra<br>JD 2002. J. Exp.<br>Med. 196(4):551-5.                              | >95%                              | No           |
| <b>CVVW</b> MGFQQVC                                                                                                                                               | C9A peptide;<br>Braathen R, <i>et al.</i><br>2006 J. Biol.<br>Chem.<br>281(11):7075-81. | 60%                               | No           |
| DDEATILADNKCMSTRVTSRII<br>PSTEDPNEDIVERNIRIVVPLN<br>NRENISDPTSPLRRNFVYHLS<br>DVSKKCDPVEVELEDQVVTA<br>TQSNICNEDDGVPETCYMYD<br>RNKCYTTMVPLRYHGETKMV<br>QAALTPDSCYLD | Murine J chain                                                                          | 61%                               | No           |
| QEDERIVLVDNKCKSARITSRI<br>IRSEDPNEDIVERNIRIIVPLN<br>NRENISDPTSPLRTRFVYHLS<br>DLSKKCDPTEVELDNQIVTAT<br>QSNICDEDSATETCYTYDRN<br>KCYTAVVPLVYGGETKMVET<br>ALTPDACYPD  | Human J chain                                                                           | 58%                               | No           |
| <b>QRN</b> PRLRLIRRHPTLRIPPI                                                                                                                                      | White KD & Capra<br>JD 2002. J. Exp.<br>Med. 196(4):551-5.                              | >95%                              | Yes          |
| <b>QRNPKLKL</b> IRRHPTLRIPPI                                                                                                                                      | This study; QRN<br>derivative                                                           | >95%                              | Yes          |

All peptides (or J-chains) were fused to the IgG heavy chain C-terminal with a GGGGS linker as a spacer. Amino acids in bold are the abbreviated peptide name.

# Table S2.

| Sequence                                     | % Species 1<br>(full length) via<br>MS | pIgR binding |
|----------------------------------------------|----------------------------------------|--------------|
| QRN <b>PRLRL</b> IRRHPTLRIPPI (original QRN) | 70%                                    | Yes          |
| QRN <b>PRRRR</b> IRRHPTLRIPPI                | <1%                                    | No           |
| QRN <b>PRQRQ</b> IRRHPTLRIPPI                | N.D.                                   | No           |
| QRN <b>PRKRK</b> IRRHPTLRIPPI                | 42%                                    | Yes          |
| QRN <b>PRRPI</b> IRRHPTLRIPPI                | N.D.                                   | No           |
| QRN <b>PKLKL</b> IRRHPTLRIPPI                | 85%                                    | Yes          |

Mutations in the 'RLRL' sequence of the QRN peptide were mutated and analyzed for pIgR binding and percentage of 'full-length' peptide.

# Figure S2

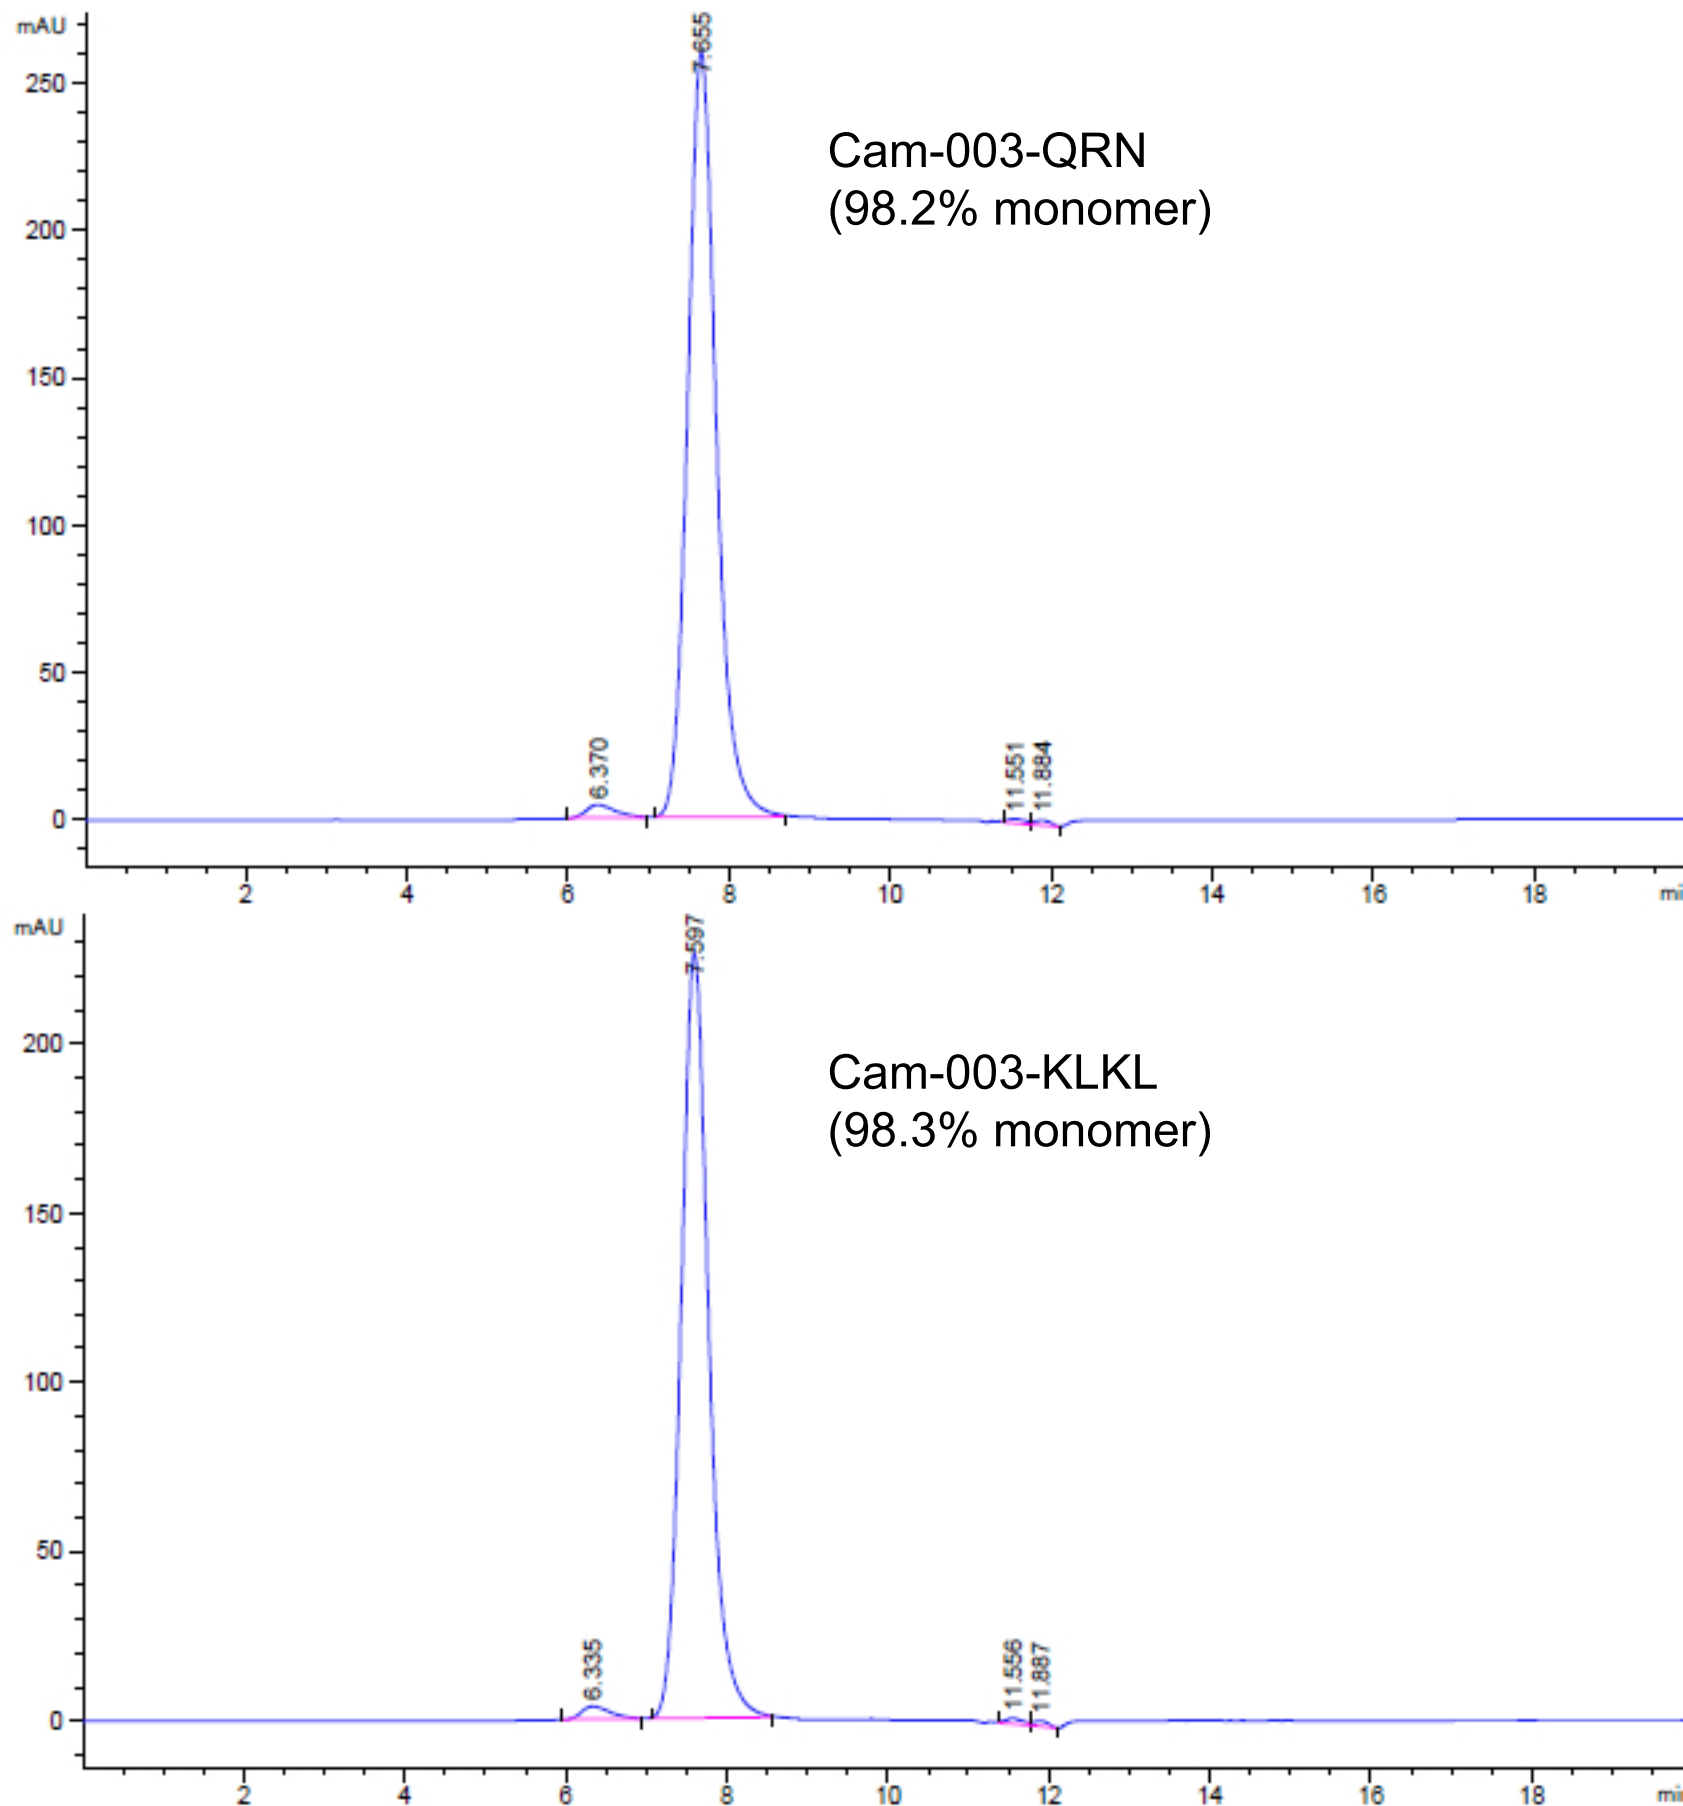

Figure S2. Size exclusion Chromatography (SEC) traces of purified Cam-003-QRN and Cam-003-KLKL

# Figure S3

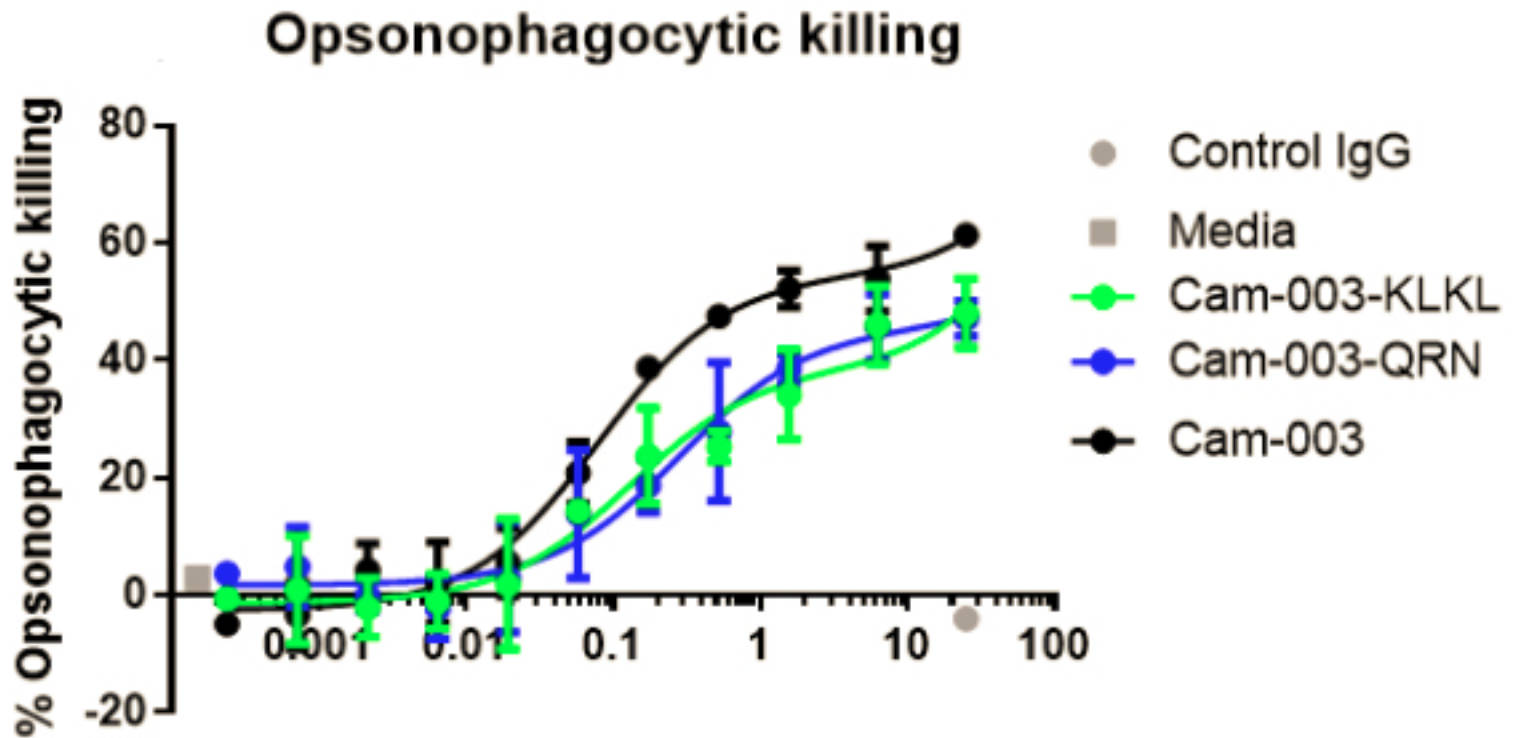

Figure S3. Opsonophagocytosis assay with luminescent *P. aeruginosa* serogroup 05 strain PAO1 (PAO1.lux) & baby rabbit complement show Cam-003-QRN (blue) and Cam-003-KLKL (green) having slightly decreased OPK activity compared to the parental molecule Cam-003 (black) (A). No OPK activity was observed for the isotype control IgG R347 (grey circle) or media alone (grey square). Data are representative of at least 2 independent experiments.
